# Supplementary material for: Patterns of Alcohol Consumption Among Individuals With Alcohol Use Disorder During the COVID-19 Pandemic and Lockdowns in Germany
Source: PubMed Central journal article supplement (PMC9344361; doi:10.1001/jamanetworkopen.2022.24641), 2022-08-01
Supplement: jamanetwopen-e2224641-s002.pdf [file jamanetwopen-e2224641-s002.pdf]

\*First name, last name, and suffix (if applicable) are required and will appear in PubMed.

| <b>*Group Name(s): ReCoDe Consortium</b> |                    |                              |                         |                                       |                                                 |                                                                |                                                                                                   |
|------------------------------------------|--------------------|------------------------------|-------------------------|---------------------------------------|-------------------------------------------------|----------------------------------------------------------------|---------------------------------------------------------------------------------------------------|
| <b>*First Name and Middle Initial(s)</b> | <b>*Last Name</b>  | <b>*Suffix (eg, Jr, III)</b> | <b>Academic Degrees</b> | <b>Institution</b>                    | <b>Location (city, state/province, country)</b> | <b>Role or Contribution, eg, chair, principal investigator</b> | <b>Group (if more than 1 Group listed in the byline) and/or Subgroup (eg, Steering Committee)</b> |
| Nina                                     | Romanczuk-Seiferth |                              | Dr. rer. medic.         | Charité Berlin                        | Berlin, Germany                                 | Project-PI                                                     | ReCoDe-Consortium                                                                                 |
| Andreas                                  | Ströhle            |                              | MD                      | Charité Berlin                        | Berlin, Germany                                 | Project-PI                                                     | ReCoDe-Consortium                                                                                 |
| Felix                                    | Berpohl            |                              | MD                      | Charité Berlin                        | Berlin, Germany                                 | Project-PI                                                     | ReCoDe-Consortium                                                                                 |
| Christine                                | Heim               |                              | Dr. rer. nat.           | Charité Berlin                        | Berlin, Germany                                 | Project-PI                                                     | ReCoDe-Consortium                                                                                 |
| Anne                                     | Beck               |                              | Dr. rer. medic.         | Health and Medical University Potsdam | Potsdam, Germany                                | Project-PI                                                     | ReCoDe-Consortium                                                                                 |
| Heike                                    | Tost               |                              | MD, PhD                 | ZI Mannheim                           | Mannheim, Germany                               | Project-PI                                                     | ReCoDe-Consortium                                                                                 |
| Tobias                                   | Banaschewski       |                              | MD, Dr. rer. nat.       | ZI Mannheim                           | Mannheim, Germany                               | Project-PI                                                     | ReCoDe-Consortium                                                                                 |
| Falk                                     | Kiefer             |                              | MD                      | ZI Mannheim                           | Mannheim, Germany                               | Project-PI                                                     | ReCoDe-Consortium                                                                                 |
| Andreas                                  | Meyer-Lindenberg   |                              | MD, PhD                 | ZI Mannheim                           | Mannheim, Germany                               | Project-PI                                                     | ReCoDe-Consortium                                                                                 |
| Christian                                | Beste              |                              | Dr. rer. nat.           | TU Dresden                            | Dresden, Germany                                | Project-PI                                                     | ReCoDe-Consortium                                                                                 |
| Tanja                                    | Endraß             |                              | Dr. rer. nat.           | TU Dresden                            | Dresden, Germany                                | Project-PI                                                     | ReCoDe-Consortium                                                                                 |
| Stefan                                   | Kiebel             |                              | Dr. rer. nat.           | TU Dresden                            | Dresden, Germany                                | Project-PI                                                     | ReCoDe-Consortium                                                                                 |
| Clemens                                  | Kirschbaum         |                              | Dr. rer. nat.           | TU Dresden                            | Dresden, Germany                                | Project-PI                                                     | ReCoDe-Consortium                                                                                 |
| Michael                                  | Marxen             |                              | PhD                     | TU Dresden                            | Dresden, Germany                                | Project-PI                                                     | ReCoDe-Consortium                                                                                 |
| Wolfgang E.                              | Nagel              |                              | Dr. rer. nat.           | TU Dresden                            | Dresden, Germany                                | Project-PI                                                     | ReCoDe-Consortium                                                                                 |
| Maximilian                               | Pilhatsch          |                              | MD                      | TU Dresden                            | Dresden, Germany                                | Project-PI                                                     | ReCoDe-Consortium                                                                                 |
| Ann-Kathrin                              | Stock              |                              | Dr. rer. nat.           | TU Dresden                            | Dresden, Germany                                | Project-PI                                                     | ReCoDe-Consortium                                                                                 |
| Viktoria                                 | Arndt              |                              | Dipl.-Psych.            | TU Dresden                            | Dresden, Germany                                | Co-Investigator                                                | ReCoDe-Consortium                                                                                 |
| Matthew                                  | Belanger           |                              | M.Sc.                   | TU Dresden                            | Dresden, Germany                                | Co-Investigator                                                | ReCoDe-Consortium                                                                                 |
| Hao                                      | Chen               |                              | M.Sc.                   | TU Dresden                            | Dresden, Germany                                | Co-Investigator                                                | ReCoDe-Consortium                                                                                 |
| Sasha                                    | Frölich            |                              | M.Sc.                   | TU Dresden                            | Dresden, Germany                                | Co-Investigator                                                | ReCoDe-Consortium                                                                                 |
| Filippo                                  | Ghin               |                              | M.Sc.                   | TU Dresden                            | Dresden, Germany                                | Co-Investigator                                                | ReCoDe-Consortium                                                                                 |
| Caroline                                 | Neumer             |                              | M.Sc.                   | TU Dresden                            | Dresden, Germany                                | Co-Investigator                                                | ReCoDe-Consortium                                                                                 |
| Sarah                                    | Schwöbel           |                              | Dr. rer. nat.           | TU Dresden                            | Dresden, Germany                                | Co-Investigator                                                | ReCoDe-Consortium                                                                                 |
| Gabriela                                 | Gan                |                              | PhD                     | ZI Mannheim                           | Mannheim, Germany                               | Co-Investigator                                                | ReCoDe-Consortium                                                                                 |
| Kristina                                 | Schwarz            |                              | Dipl.-Psych.            | ZI Mannheim                           | Mannheim, Germany                               | Co-Investigator                                                | ReCoDe-Consortium                                                                                 |
| Stefanie                                 | Kunas              |                              | M.Sc.                   | Charité Berlin                        | Berlin, Germany                                 | Co-Investigator                                                | ReCoDe-Consortium                                                                                 |
| Heiner                                   | Stuke              |                              | MD                      | Charité Berlin                        | Berlin, Germany                                 | Co-Investigator                                                | ReCoDe-Consortium                                                                                 |
